# Supplementary material for: MDGA2 is a novel tumour suppressor cooperating with DMAP1 in gastric cancer and is associated with disease outcome
Source: HighWire-hosted journal article supplement (doi:10.1136/gutjnl-2015-309276), 2015-07-23

**Supplementary Figure 1. Effect of MDGA2 on cell migration and invasion.** (A) The cell motility of AGS and BGC823 cells with MDGA2 expression vector or empty vector was determined by wound healing assay. Photographs were taken at 0 and 48 h to determine the different mobility between MDGA2 expression vector cells and empty vector cells. Number of cells that entered the scratch region was shown as mean  $\pm$  SD. All experiments were performed in triplicate. (B) Matrigel invasion assay shows invasiveness and metastasis of cells with or without MDGA2. The data are means  $\pm$  SD. of three separate experiments. \* $P < 0.01$ , \*\* $P < 0.001$ . (C) Altered protein expression of epithelial-mesenchymal transition (EMT) markers including E-cadherin, N-cadherin, Vimentin, Snail and Slug in MDGA2 overexpressing cells were examined by Western blot.

### Supplementary Figure 1

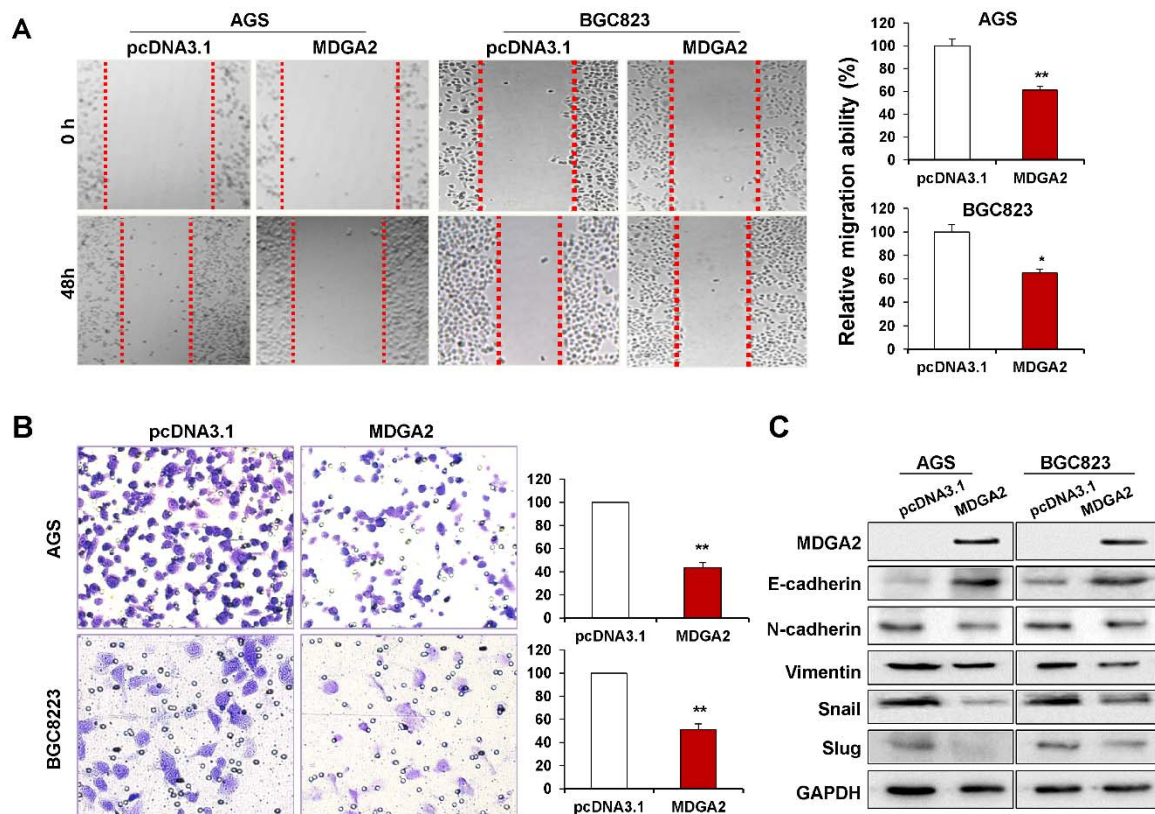

**Supplementary Figure 2. MDGA2 induces p53/p21 signaling cascade partially dependent on DMAP1.** Knockdown DMAP1 by siDMAP1 transfection in AGS and BGC823 cells with stable MDGA2 over-expression partially decreased the protein expression of p53 and p21 in both cell lines as determined by Western blot. siNC, si-control.

Supplementary Figure 2

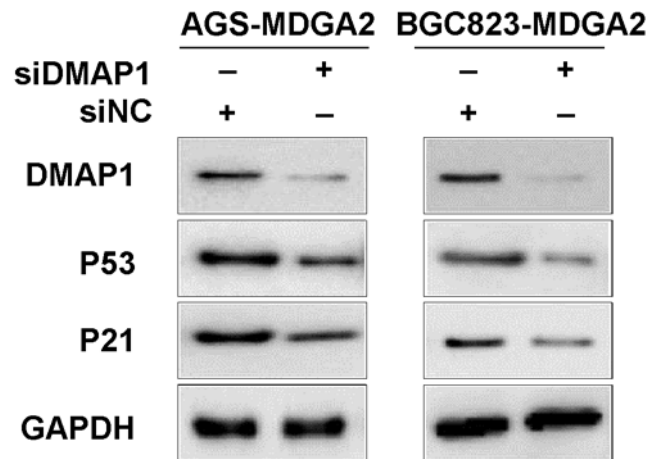

Supplement: gutjnl-2015-309276supp_figures.pdf [file gutjnl-2015-309276supp_figures.pdf]
