# Supplementary material for: MDGA2 is a novel tumour suppressor cooperating with DMAP1 in gastric cancer and is associated with disease outcome
Source: HighWire-hosted journal article supplement (doi:10.1136/gutjnl-2015-309276), 2015-07-23
Supplement: gutjnl-2015-309276supp_tables.pdf [file gutjnl-2015-309276supp_tables.pdf]

**Supplementary Table 1. Antibodies used in this study**

| Ab name                                                    | Cat #     | Company             | Source | Dilution | Note       |
|------------------------------------------------------------|-----------|---------------------|--------|----------|------------|
| MDGA2                                                      | ab121164  | Abcam               | Rabbit | 1/500    | WB<br>/IHC |
| DMAP1                                                      | #07-2072  | Millipore           | Rabbit | 1/500    |            |
| ATM                                                        | ab91      | Abcam               | Rabbit | 1/200    |            |
| 6X His tag                                                 | ab18184   | Abcam               | Mouse  | 1/1000   |            |
| phospho-ATM (Ser1981)                                      | #05-740   | Millipore           | Mouse  | 1/500    |            |
| p53                                                        | sc-126    | Santa Cruz          | Mouse  | 1/300    |            |
| GAPDH                                                      | sc-25778  | Santa Cruz          | Rabbit | 1/5000   |            |
| Cleaved Caspase-8                                          | #9496L    | Cell Signaling      | Rabbit | 1/500    |            |
| Cleaved Caspase-9                                          | #9501     | Cell Signaling      | Rabbit | 1/500    |            |
| Cleaved Caspase-7                                          | #9491     | Cell Signaling      | Rabbit | 1/500    |            |
| Cleaved Caspase-3                                          | #9661     | Cell Signaling      | Rabbit | 1/300    |            |
| Cleaved PARP                                               | #9541     | Cell Signaling      | Rabbit | 1/500    |            |
| p21 (F-5)                                                  | sc-6246   | Santa Cruz          | Mouse  | 1/500    |            |
| p27 Kip1                                                   | #2552     | Cell Signaling      | Rabbit | 1/500    |            |
| Cyclin D1                                                  | sc-8396   | Santa Cruz          | Mouse  | 1/1000   |            |
| CDK4                                                       | #12790    | Cell Signaling      | Rabbit | 1/1000   |            |
| PCNA                                                       | ab29-100  | Abcam               | Mouse  | 1/1000   |            |
| Ubiquitin                                                  | #3936     | Cell Signaling      | Mouse  | 1/1000   |            |
| E-cadherin                                                 | #3195     | Cell Signaling      | Rabbit | 1/300    |            |
| N-cadherin                                                 | #13116    | Cell Signaling      | Rabbit | 1/300    |            |
| Vimentin                                                   | #5741     | Cell Signaling      | Rabbit | 1/300    |            |
| Snail                                                      | #3879     | Cell Signaling      | Rabbit | 1/300    |            |
| Slug                                                       | #9585     | Cell Signaling      | Rabbit | 1/300    |            |
| Anti-rabbit Ig G<br>HRP-linked antibody                    | #7074s    | Cell Signaling      |        | 1/3000   |            |
| Anti-mouse IgG<br>HRP-linked antibody                      | #7076s    | Cell Signaling      |        | 1/3000   |            |
| MDGA2                                                      | sc-163070 | Santa Cruz          | Goat   | 1/100    | IF         |
| DMAP1                                                      | ab2848    | Abcam               | Rabbit | 1/500    |            |
| Alexa Fluor® 488 Goat<br>Anti-Rabbit IgG (H+L)<br>antibody | A-11008   | Molecular<br>Probes |        | 1/500    |            |
| Alexa Fluor® 594 Donkey<br>Anti-Goat IgG (H+L)<br>antibody | A-11058   | Molecular<br>Probes |        | 1/500    |            |

WB, western blotting; IHC, immunohistochemistry; IF, immunofluorescence.

**Supplementary Table 2. Distribution of patient characteristics by MDGA2 methylation status**

| <b>Variable</b>         | <b>Methylated<br/>(n=136)</b> | <b>%</b> | <b>Nonmethylated<br/>(n=82)</b> | <b>%</b> | <b>P value</b> |
|-------------------------|-------------------------------|----------|---------------------------------|----------|----------------|
| <b>Mean age, y ± SD</b> | 56.81±14.055                  |          | 56.04±12.340                    |          | 0.334          |
| <b>Gender</b>           |                               |          |                                 |          | 0.534          |
| M                       | 87                            | 64.0     | 49                              | 36.0     |                |
| F                       | 49                            | 59.8     | 33                              | 40.2     |                |
| <b><i>H. pylori</i></b> |                               |          |                                 |          | 0.075          |
| Positive                | 30                            | 65.2     | 16                              | 34.8     |                |
| Negative                | 54                            | 54.5     | 45                              | 45.5     |                |
| <b>TNM</b>              |                               |          |                                 |          | 0.509          |
| I                       | 17                            | 51.5     | 16                              | 48.5     |                |
| II                      | 20                            | 62.5     | 12                              | 37.5     |                |
| III                     | 54                            | 62.8     | 32                              | 37.2     |                |
| IV                      | 45                            | 67.2     | 22                              | 32.8     |                |
| <b>Lauren</b>           |                               |          |                                 |          | 0.771          |
| Intestinal              | 127                           | 62.0     | 78                              | 38.0     |                |
| Non-intestinal          | 9                             | 69.2     | 4                               | 30.8     |                |
| <b>Differentiation</b>  |                               |          |                                 |          | 0.263          |
| Low                     | 84                            | 58.7     | 59                              | 41.3     |                |
| Moderate or High        | 44                            | 67.7     | 21                              | 32.3     |                |

SD, standard deviation.

**Supplementary Table 3. Targets identified by MS**

| <b>No.</b> | <b>mass</b> | <b>full name</b>                                        | <b>protein name</b> | <b>gene name</b> |
|------------|-------------|---------------------------------------------------------|---------------------|------------------|
| 13         | 227646      | Myosin-9                                                | MYH9                | MYH9             |
| 15         | 281880      | Centrosome-associated protein CEP250                    | CP250               | CEP250           |
|            | 228787      | Rootletin                                               | CROCC               | CROCC            |
| 16         | 130928      | Filamin A-interacting protein 1-like                    | FIL1L               | FILIP1L          |
|            | 273781      | Talin-2                                                 | TLN2                | TLN2             |
|            | 197997      | RANBP2-like and GRIP domain-containing protein 1/2      | RGPD1               | RGPD1            |
|            | 118407      | Presequence protease, mitochondrial                     | PREP                | PITRM1           |
| 18         | 273781      | Talin-2                                                 | TLN2                | TLN2             |
| 19         | 116223      | CAP-Gly domain-containing linker protein 2              | CLIP2               | CLIP2            |
| 20         | 50269       | Acyl-coenzyme A thioesterase 9, mitochondrial           | ACOT9               | ACOT9            |
| 21         | 36570       | Zinc finger protein 691                                 | ZN691               | ZNF691           |
| 22         | 59773       | Probable ATP-dependent RNA helicase DDX28               | DDX28               | DDX28            |
|            | 93446       | Ecotropic viral integration site 5 protein homolog      | EVI5                | EVI5             |
| 23         | 34333       | Tricarboxylate transport protein, mitochondrial         | TXTP                | SLC25A1          |
| 24         | 53131       | DNA methyltransferase 1-associated protein 1            | DMAP1               | DMAP1            |
| 26         | 44065       | Keratin, type I cytoskeletal 19                         | K1C19               | KRT19            |
| 27         | 32945       | Tropomyosin beta chain                                  | TPM2                | TPM2             |
| 28         | 7786        | Very putative protein from MEG3 locus                   | YYY4                | MEG3             |
| 29         | 32856       | Tropomyosin alpha-3 chain                               | TPM3                | TPM3             |
|            | 28619       | Tropomyosin alpha-4 chain                               | TPM4                | TPM4             |
| 30         | 43163       | Serpin B7                                               | SPB7                | SERPINB7         |
| 32         | 34333       | Tricarboxylate transport protein, mitochondrial         | TXTP                | SLC25A1          |
| 33         | 19839       | Myosin regulatory light chain 12A                       | ML12A               | MYL12A           |
|            | 19824       | Myosin regulatory light chain 12B                       | ML12B               | MYL12B           |
| 34         | 38716       | Fibronectin type 3 and ankyrin repeat domains protein 1 | FANK1               | FANK1            |
| 35         | 17090       | Myosin light polypeptide 6                              | MYL6                | MYL6             |
| 36         | 59097       | U4/U6 small nuclear ribonucleoprotein Prp4              | PRP4                | PRPF4            |

**Supplementary Table 4. Nucleotide sequences of the primers used in this study**

| Primer Name  | Sequence (5'-3')            | Size/bp | Note   |
|--------------|-----------------------------|---------|--------|
| MDGA2-F      | TGGGCTGGATATGTTTCATGTT      | 248     | RT-PCR |
| MDGA2-R      | CTGATCTGTGGACGTGGATG        |         |        |
| DMAP1- F     | AAGGACGGAGCAATGTTCTTC       | 133     |        |
| DMAP1-R      | CATCGTGGAGATAAAGCTGGT       |         |        |
| Actin-F      | GTCTTCCCCTCCATCGTG          | 113     |        |
| Actin-R      | AGGGTGAGGATGCCTCTCTT        |         |        |
| MDGA2-BGS-F  | TTATTTTGGGTTTAAGGTGGTAGTT   | 221     | BGS    |
| MDGA2-BGS-R  | CCCTCCTTTACTCTACCTTCCTATATC |         |        |
| MDGA2-MSP-mF | CGGTTTTCGGGTATTTTCGG        | 171     | MSP    |
| MDGA2-MSP-mR | TCGCGATTCCAACCTCACCG        |         |        |
| MDGA2-MSP-uF | AGTGGTTTTTGGGTATTTTGG       | 171     |        |
| MDGA2-MSP-uR | CATCACAATTCCAACCTCACCA      |         |        |

BGS, bisulfite genomic sequencing; MSP, methylation specific PCR.
